# Supplementary material for: Low thermal conductivity and high figure of merit for rapidly synthesized n-type Pb1−xBixTe alloys
Source: Royal Society of Chemistry journal article supplement (doi:10.1039/c8dt03387k), 2018-01-01
Supplement: c8dt03387k1.pdf [file c8dt03387k1.pdf]

# Electronic Supplementary Information

## Low thermal conductivity and high figure of merit for rapidly synthesized n-type $\text{Pb}_{1-x}\text{Bi}_x\text{Te}$ alloys

Tingting Chen<sup>1</sup>, Hongchao Wang<sup>1,2\*</sup>, Wenbin Su<sup>1</sup>, Fahad Mehmood<sup>1</sup>, Teng Wang<sup>1</sup>,  
Jinze Zhai<sup>1</sup>, Xue Wang<sup>1</sup>, Chunlei Wang<sup>1#</sup>

1. School of Physics, State Key Laboratory of Crystal Materials, Shandong University,  
Jinan, China.

2. State Key Laboratory of Metastable Materials Science and Technology, Yanshan  
University, Qinhuangdao, China.

\* E-mail: [wanghc@sdu.edu.cn](mailto:wanghc@sdu.edu.cn) (H. Wang)

# E-mail: [wangcl@sdu.edu.cn](mailto:wangcl@sdu.edu.cn) (C. Wang)

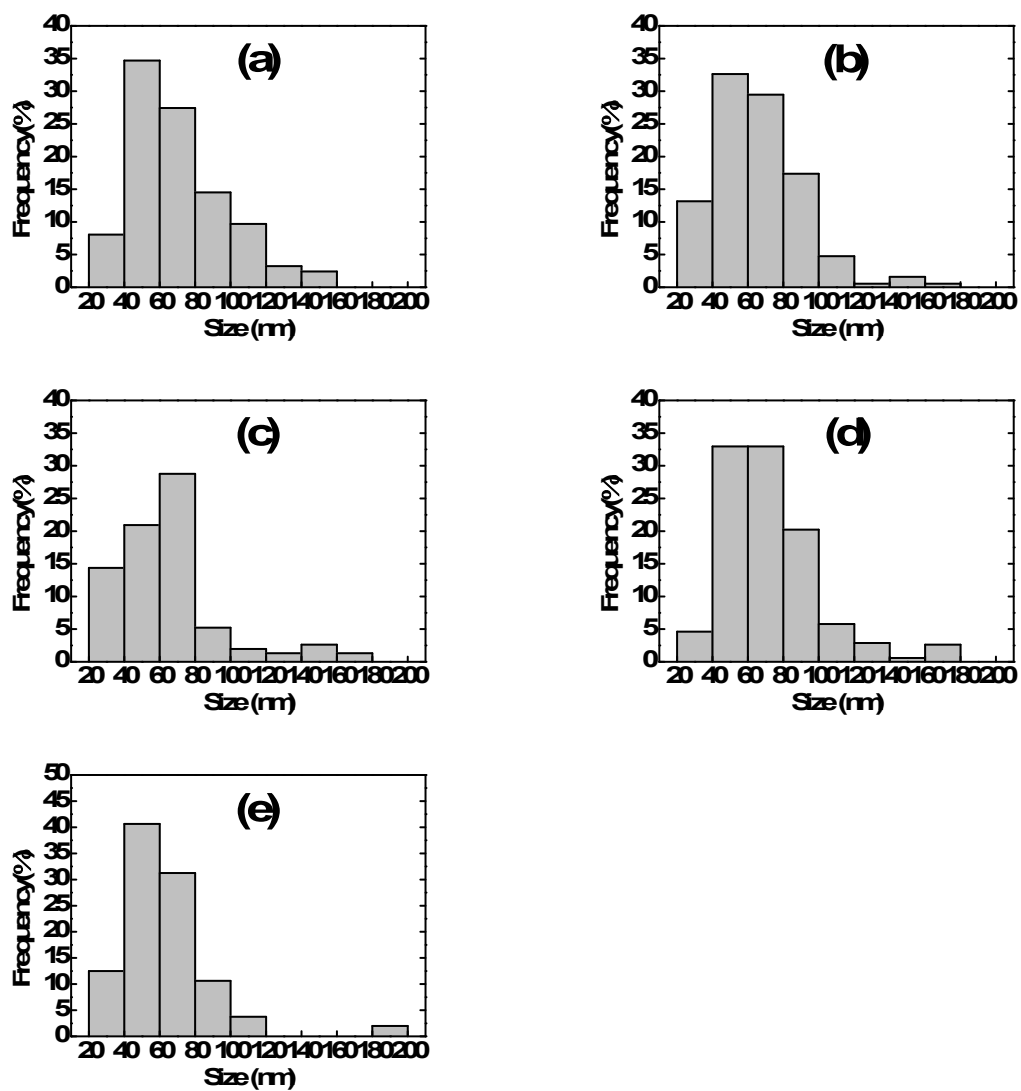

**Figure S1.** Distribution of grain size of  $\text{Pb}_{1-x}\text{Bi}_x\text{Te}$  nano-powders for (a)  $x=0.00$ , (b)  $x=0.01$ , (c)  $x=0.02$ , (d)  $x=0.03$ , and (e)  $x=0.04$ .

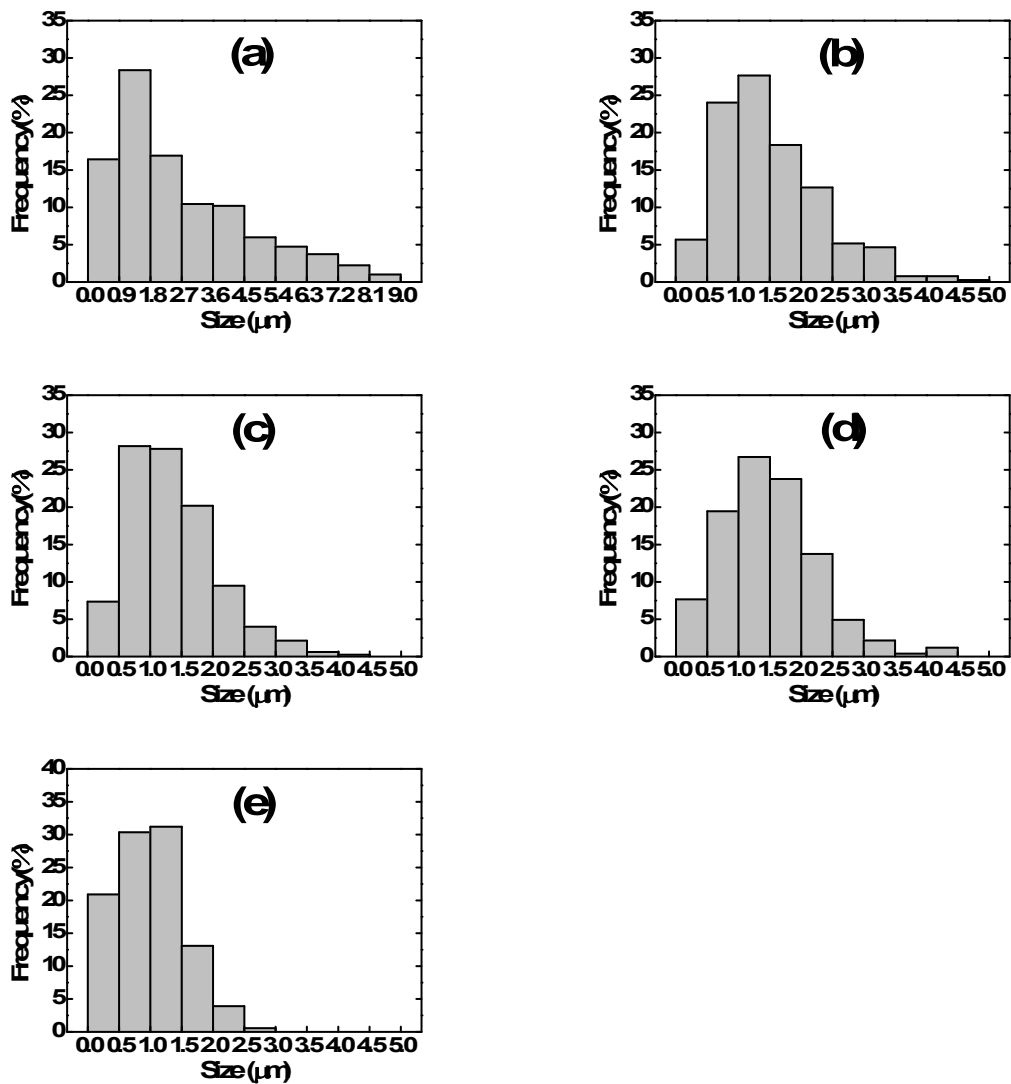

Figure S2. Distribution of grain size of  $\text{Pb}_{1-x}\text{Bi}_x\text{Te}$  bulk alloys for (a)  $x=0.00$ , (b)  $x=0.01$ , (c)  $x=0.02$ , (d)  $x=0.03$ , and (e)  $x=0.04$ .

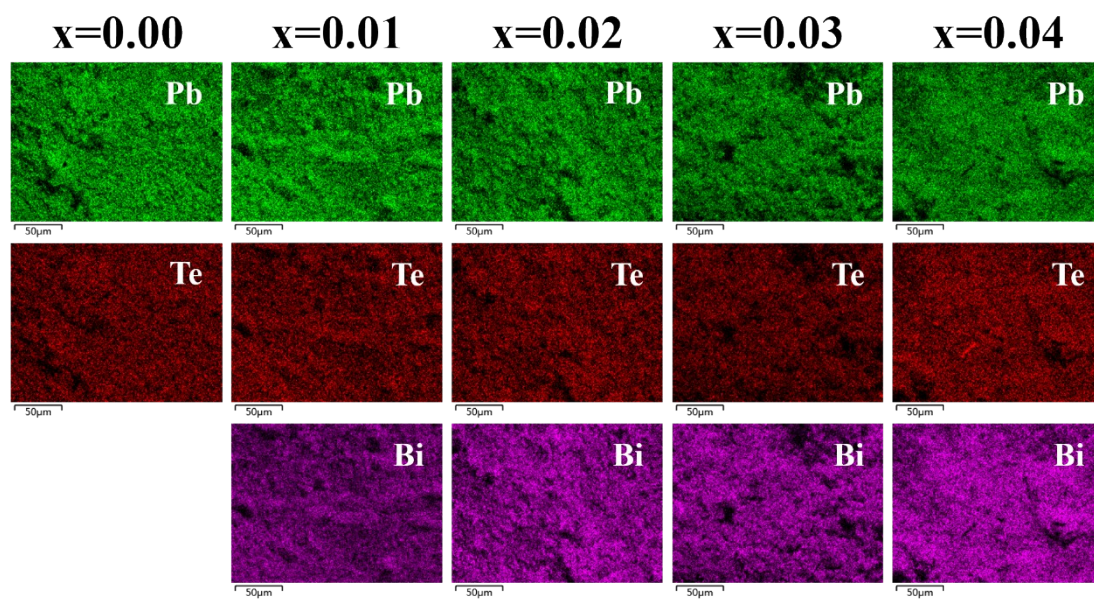

**Figure S3** The EDS mapping for  $\text{Pb}_{1-x}\text{Bi}_x\text{Te}$  nano-powders.

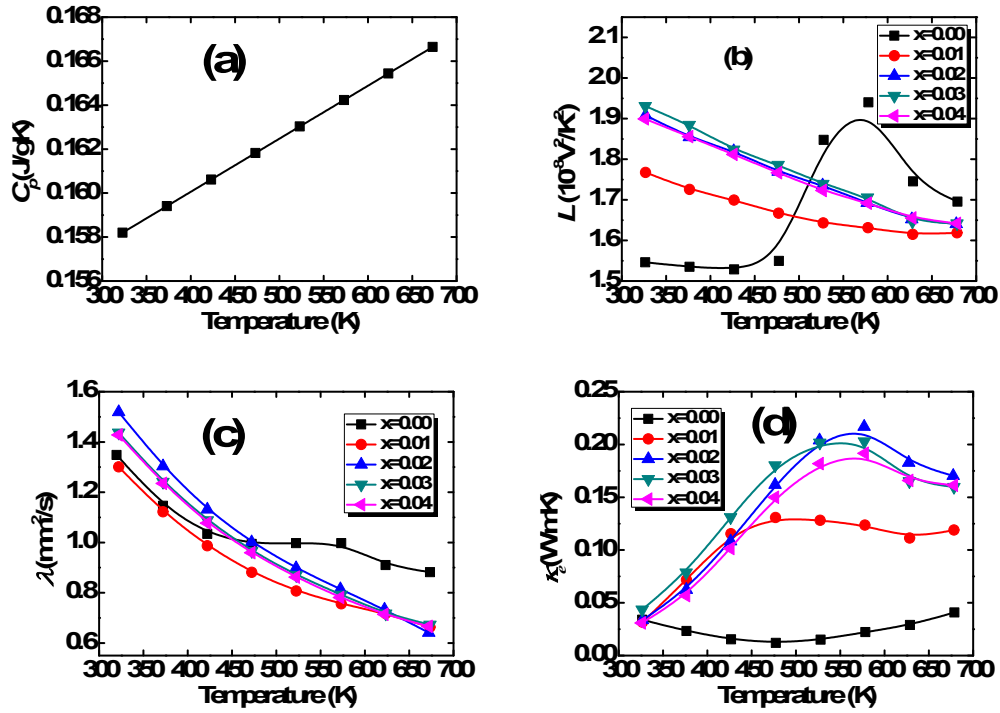

**Figure S4** Temperature dependence of (a) the heat capacities derived from the equation of  $C_p$  ( $k_B$  atom) =  $3.07 + 4.7 \times 10^{-4} \times (T/K - 300)^1$ , (b) the Lorenz numbers derived from the equation of  $L = 1.5 + \exp(-|S|/116)^2$ , (c) the thermal diffusivities, and (d) the electronic thermal conductivities for  $Pb_{1-x}Bi_xTe$  alloys.

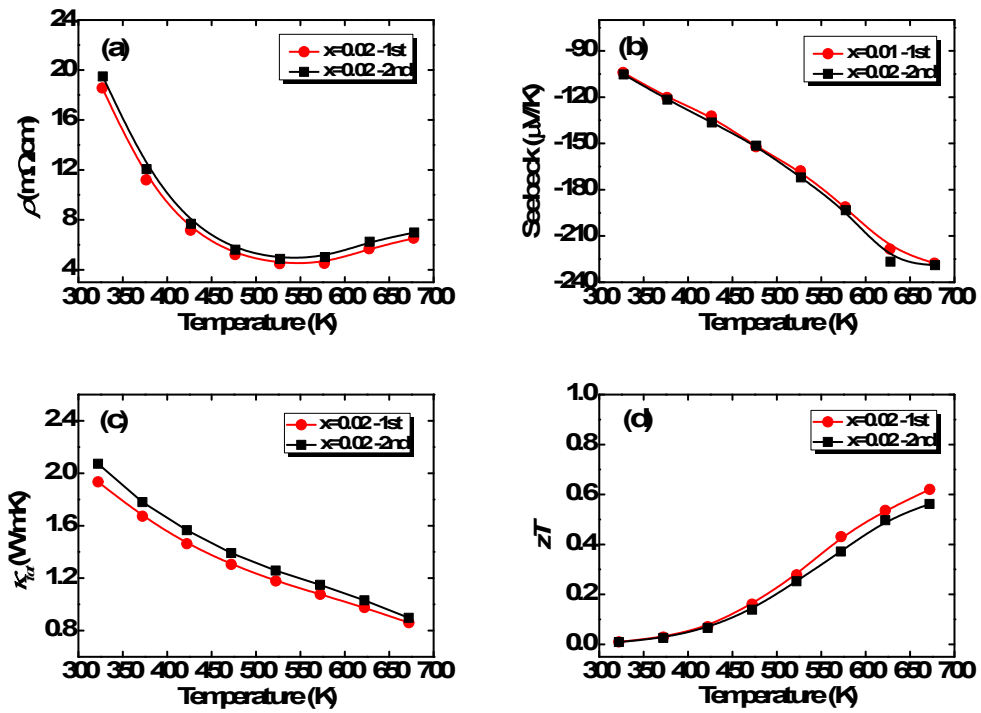

Figure S5 Repeated measurements of (a) electrical resistivity, (b) Seebeck coefficient, (c) total thermal conductivity and (d) figure of merit for  $\text{Pb}_{0.98}\text{Bi}_{0.02}\text{Te}$  alloys.

**Table S1.** Experimental densities, theoretical densities and relative densities for  $\text{Pb}_{1-x}\text{Bi}_x\text{Te}$  alloys.

$\text{Pb}_{1-x}\text{Bi}_x\text{Te}$  alloys.

| <b>Compositions</b> | <b>Experimental<br/>Density (g/cm<sup>3</sup>)</b> | <b>Theoretical<br/>Density (g/cm<sup>3</sup>)</b> | <b>Relative density<br/>(%)</b> |
|---------------------|----------------------------------------------------|---------------------------------------------------|---------------------------------|
| x=0.00              | 8.05                                               | 8.24                                              | 97.7                            |
| x=0.01              | 8.07                                               | 8.26                                              | 97.7                            |
| x=0.02              | 8.06                                               | 8.27                                              | 97.4                            |
| x=0.03              | 8.05                                               | 8.26                                              | 97.4                            |
| x=0.04              | 8.07                                               | 8.27                                              | 97.5                            |

**Table S2.** The atom percentage of each element in  $\text{Pb}_{1-x}\text{Bi}_x\text{Te}$  nano-powders obtained from EDS results.

| <b>Compositions</b> | <b>Pb (at%)</b> | <b>Te (at%)</b> | <b>Bi (at%)</b> |
|---------------------|-----------------|-----------------|-----------------|
| x=0.00              | 50.8            | 49.2            | 0.0             |
| x=0.01              | 50.4            | 48.8            | 0.8             |
| x=0.02              | 49.7            | 48.5            | 1.7             |
| x=0.03              | 50.6            | 47.5            | 1.9             |
| x=0.04              | 49.8            | 48.3            | 1.9             |



## Reference

1. R. Blachnik and R. Igel, *Zeitschrift für Naturforschung B*, 1974, **29**, 625–629.
2. H. S. Kim, Z. M. Gibbs, Y. Tang, H. Wang and G. J. Snyder, *APL Materials*, 2015, **3**, 041506.
